# Supplementary material for: Insight into the adsorption of Cr(vi) on functionalized carboxymethyl cellulose-based sponge via experimental and theoretical calculations
Source: Royal Society of Chemistry journal article supplement (doi:10.1039/d1nj04012j), 2021-01-01
Supplement: d1nj04012j1.pdf [file d1nj04012j1.pdf]

## **Adsorption Behavior and Mechanisms of Cr(VI) on the Functionalized Carboxymethyl Cellulose-based Sponge**

Shengli Zhang\*, Yanbo Pei, Menglin Li, Wei Li, Kai Su\*, Junmin Chen, Hongwei Yang

Faculty of Geosciences and Environmental Engineering, Southwest Jiaotong University, 611756

Chengdu, Sichuan, China

\*Corresponding Authors.

E-mail: zhang222@home.swjtu.edu.cn (S. Zhang), ksu@swjtu.edu.cn (K. Su)

## Equations involved in the paper

$$\varepsilon = \frac{C_0 - C_e}{C_0} \times 100\% \quad (1)$$

$$q_e = \frac{(C_0 - C_e)V}{m} \quad (2)$$

Where  $C_0$  (mg L<sup>-1</sup>) and  $C_e$  (mg L<sup>-1</sup>) are the initial and equilibrium concentrations of Cr(VI), respectively;  $V$  (L) is the volume of solvent, and  $m$  (g) is the mass of PEI-PAM-CMC.

$$\ln(q_e - q_t) = \ln q_e - k_1 t \quad (3)$$

$$\frac{t}{q_t} = \frac{1}{k_2 q_e^2} + \frac{1}{q_e} t \quad (4)$$

$$q_t = k_d t^{0.5} \quad (5)$$

Where  $t$  (min) is the adsorption time;  $q_t$  and  $q_e$  (mg g<sup>-1</sup>) represent the adsorption capacity at time  $t$  and equilibrium, respectively;  $k_1$  (min<sup>-1</sup>),  $k_2$  (g mg<sup>-1</sup> min<sup>-1</sup>) and  $k_d$  (mg g<sup>-1</sup> min<sup>0.5</sup>) are the rate constants for the pseudo-first-order, pseudo-second-order kinetic models and intra-particle diffusion model, respectively.

$$\frac{c_e}{q_e} = \frac{1}{b q_{\max}} + \frac{c_e}{q_{\max}} \quad (6)$$

$$\ln q_e = \frac{1}{n} \ln c_e + \ln K_f \quad (7)$$

Where  $q_{\max}$  (mg g<sup>-1</sup>) is the theoretical maximum equilibrium adsorption capacity;  $b$  (L mg<sup>-1</sup>) is adsorption constant of the Langmuir model,  $K_f$  (mg<sup>1-1/n</sup>L<sup>1/n</sup>g<sup>-1</sup>) is the Freundlich equilibrium constant related to adsorption capacity;  $n$  is the Freundlich coefficient.

$$\Delta G = -RT \ln K_0 \quad (8)$$

$$\ln K_0 = \frac{\Delta S}{R} - \frac{\Delta H}{RT} \quad (9)$$

Where R is the ideal gas constant (8.314 J mol<sup>-1</sup> K<sup>-1</sup>), T is the temperature in Kelvin, and  $K_0$  (L g<sup>-1</sup>) is the adsorption equilibrium constant.

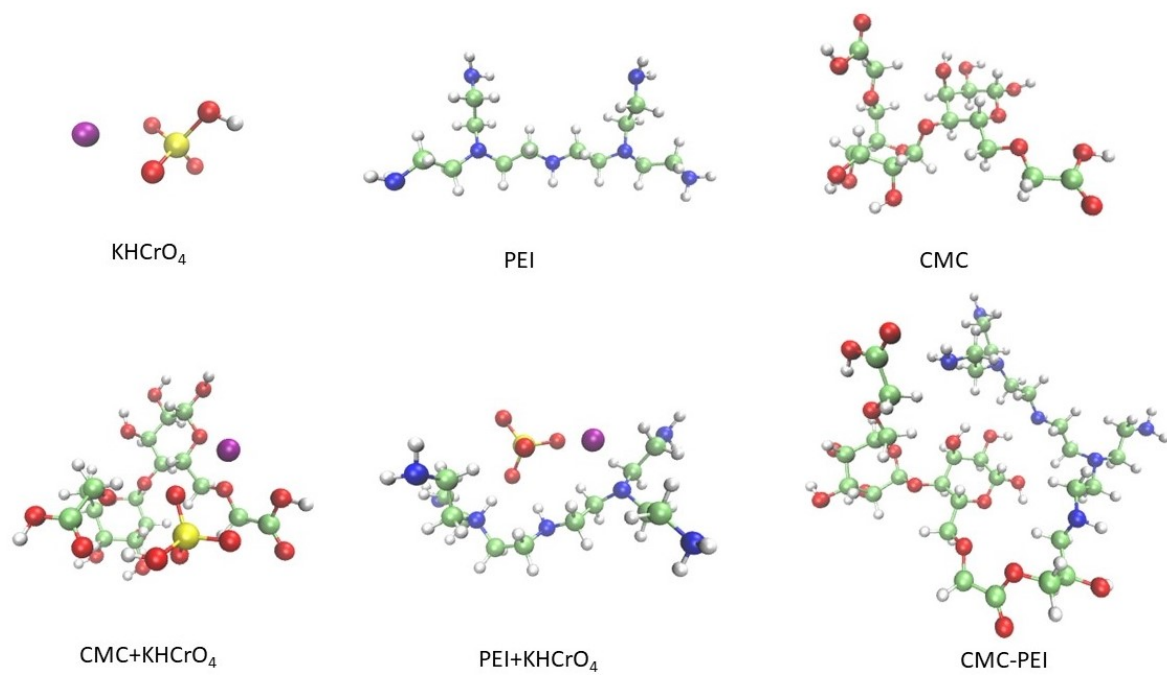

Fig. S1 Models of the theoretical calculation.

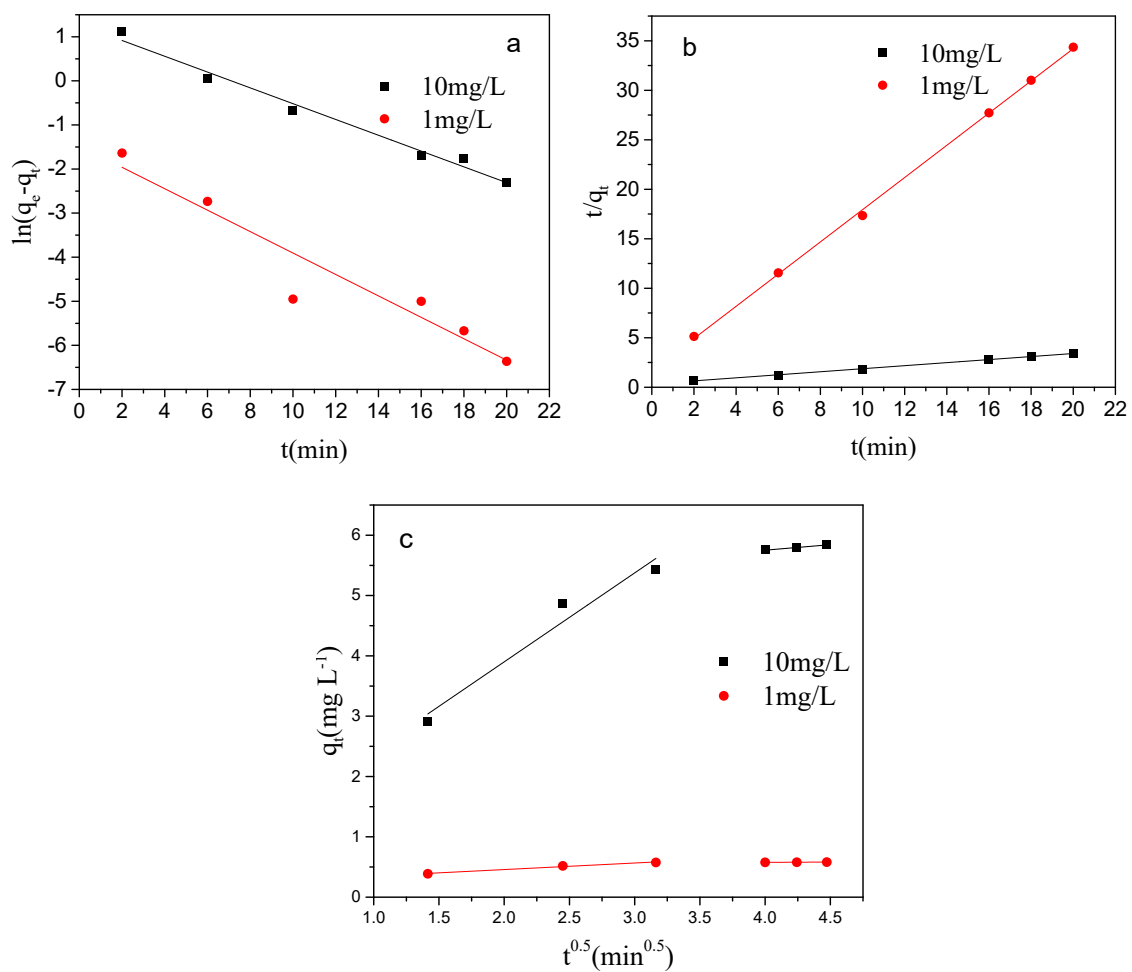

Fig. S2 Linearly fitting results obtained by pseudo-first-order kinetic model (a), pseudo-second-order kinetic model (b) and intra-particle diffusion model (c).

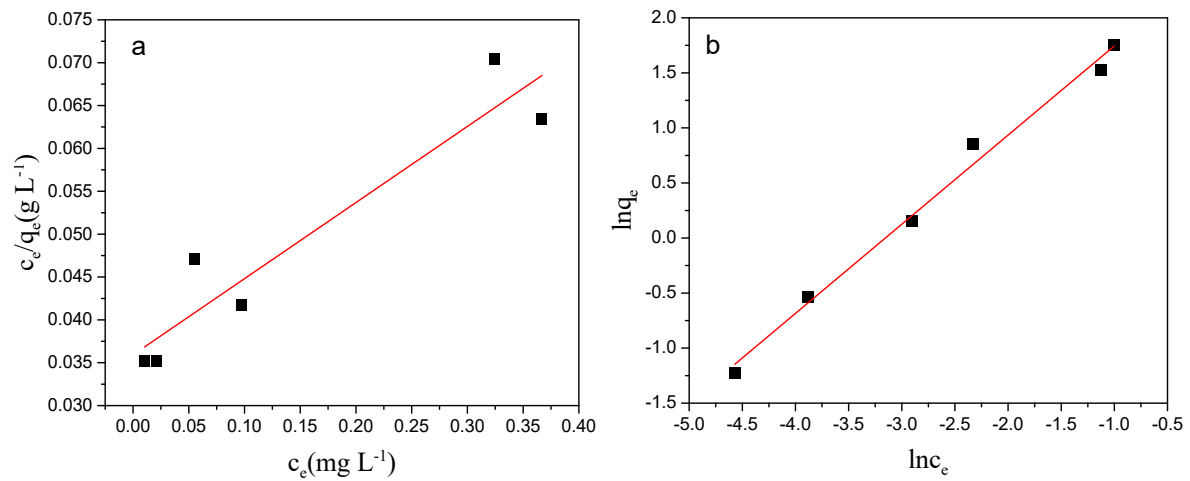

Fig. S3 Linearly fitting results obtained by Langmuir isotherm model (a) and Freundlich isotherm model (b).
